# Supplementary material for: Quantifying Key Points of Hydraulic Vulnerability Curves From Drought-Rewatering Experiment Using Differential Method
Source: Front Plant Sci. 2021 Feb 2;12:627403. doi: 10.3389/fpls.2021.627403 (PMC7884474; doi:10.3389/fpls.2021.627403)
Supplement: Supplementary file 2 [file Data_Sheet_1.XLSX]

## Sheet: HVC
0	0	0	0	0	0	0	0	0	0	0
0.2	0.002	0.002	0.003	0.002	0.003	0.002	0.002	0.002	0.003	0.002
0.4	0.013	0.013	0.014	0.012	0.016	0.012	0.014	0.012	0.015	0.013
0.6	0.036	0.037	0.038	0.035	0.042	0.034	0.037	0.033	0.039	0.035
0.8	0.073	0.074	0.075	0.072	0.084	0.071	0.074	0.068	0.077	0.073
1	0.123	0.126	0.127	0.126	0.112	0.123	0.125	0.117	0.129	0.125
1.2	0.187	0.191	0.19	0.193	0.189	0.189	0.189	0.182	0.193	0.192
1.4	0.264	0.269	0.265	0.274	0.298	0.269	0.265	0.259	0.268	0.27
1.6	0.347	0.354	0.347	0.364	0.389	0.358	0.348	0.345	0.351	0.358
1.8	0.435	0.444	0.433	0.459	0.437	0.451	0.436	0.436	0.439	0.449
2	0.524	0.535	0.52	0.553	0.576	0.546	0.525	0.528	0.525	0.542
2.2	0.61	0.622	0.604	0.644	0.606	0.636	0.611	0.615	0.608	0.631
2.4	0.687	0.701	0.682	0.725	0.741	0.719	0.69	0.695	0.685	0.713
2.6	0.757	0.772	0.752	0.794	0.777	0.792	0.76	0.764	0.753	0.785
2.8	0.814	0.831	0.812	0.851	0.831	0.852	0.82	0.823	0.812	0.845
3	0.861	0.879	0.862	0.896	0.878	0.9	0.87	0.868	0.86	0.894
3.2	0.899	0.917	0.901	0.929	0.927	0.936	0.909	0.902	0.898	0.931
3.4	0.926	0.945	0.932	0.951	0.96	0.963	0.938	0.927	0.927	0.958
3.6	0.946	0.965	0.954	0.967	0.983	0.981	0.959	0.944	0.948	0.978
3.8	0.958	0.978	0.97	0.977	1	0.993	0.974	0.955	0.963	0.991
4	0.967	0.991	0.982	0.983	1	1	0.984	0.961	0.973	1
4.5	0.977	1	0.995	0.99	1	1	0.996	0.983	0.982	1
5	0.989	1	1	1	1	1	1	0.992	0.99	1
6	1	1	1	1	1	1	1	1	1	1

## Sheet: Water potential
-Mpa	CK	D3	D8	D12U	R2U	R5U	R10U	RRU	REU	D12L	R2U	R5U	R10U	RRU	REU
1	0.034	1.626	1.756	2.861	3.059	3.312	3.059	3.269	5.542	2.638	2.355	1.564	0.962	0.475	0.083
2	0.09	1.533	2.025	2.927	3.083	2.943	2.971	3.513	5.907	2.722	2.483	1.742	1.387	0.79	0.017
3	0.387	1.436	1.984	2.951	3.05	3.001	3.423	4.384	5.443	2.742	2.386	1.806	1.014	0.463	0.181
4	0.032	1.118	1.71	3.01	2.984	3.3	3.3	4.84	5.823	2.793	2.265	1.875	1.174	0.413	0.064
5	0.052	1.461	1.911	2.872	2.988	3.097	3.239	3.495	5.087	2.689	2.542	1.612	1.376	0.637	0.151
6	0.047	1.083	1.707	2.971	3.014	3.325	3.471	5.231	5	2.735	2.442	1.559	1.213	0.764	0.037
7	0.168	0.951	2.081	2.915	2.903	3.064	2.98	3.587	5.017	2.81	2.343	1.566	1.052	0.616	0.108
8	0.16	1.059	1.957	2.984	2.899	3.027	3.041	3.38	5.652	2.7	2.373	1.968	0.985	0.401	0.106
9	0.203	1.234	1.652	2.923	2.927	2.931	3.005	3.245	5.802	2.702	2.216	1.549	1.162	0.713	0.173
10	0.095	1.248	2.014	2.85	3.078	2.947	3.121	3.814	4.17	2.754	2.609	1.909	1.384	0.776	0.188

## Sheet: Km
kg m-1 s-1 Mpa-1	CK	D3	D8	D12U	R2U	R5U	R10U	RRU	REU	D12L	R2U	R5U	R10U	RRU	REU
1	8.36	9.63	8.81	8.65	9.35	9.79	8.13	10.04	9.69	8.84	10.53	8.75	12.91	8.532	8.062
2	7.6	7.86	10.14	8.84	9.23	7.02	11.41	8.98	9.87	11.34	11.05	7.42	8.64	10.403	10.033
3	12.11	9.81	7.74	11.16	12.44	7.64	9	9.47	11.52	10.97	8.58	8.7	9.41	10.143	9.509
4	8.82	12.47	9.32	9.08	8.53	11.72	8.04	8.82	10.62	8.98	10.53	12.26	8.47	9.804	8.366
5	8.28	11.08	12.43	9.43	10.39	12.42	10.19	8.39	9.87	9.81	8.35	8.66	7.64	9.106	10.086
6	8.15	10.86	7.76	11.66	8.08	9.38	9.26	10.18	10.4	7.28	10.25	8.92	8.77	10.092	9.83
7	9.58	8.87	11.17	7.66	10.17	8.53	10.8	9.53	9.16	10.84	7.3	9.91	8.68	8.195	8.233
8	11.73	9.81	10.36	8.23	8.79	10.66	9.21	7.08	8.6	7.93	10.65	8.19	9.12	10.873	10.27
9	7.01	9.1	10.58	8.93	8.23	10.13	12.68	9.92	8.31	7.99	10.17	8.89	8.68	8.305	9.749
10	8.44	9.37	7.9	9.31	9.63	7.09	10.8	8.41	10.92	7.5	8.52	9.78	9.01	9.771	8.381

## Sheet: LC
	CK	D3	D8	D12U	R2U	R5U	R10U	RRU	REU	D12L	R2U	R5U	R10U	RRU	REU
1	0.051	0.343	0.319	0.812	0.89	0.917	0.87	0.91	1	0.793	0.654	0.317	0.107	0.0502	0.075
2	0.07	0.304	0.557	0.839	0.875	0.843	0.85	0.944	1	0.782	0.702	0.393	0.246	0.054	0.068
3	0.045	0.265	0.499	0.855	0.868	0.857	0.933	1	1	0.768	0.666	0.421	0.121	0.0609	0.041
4	0.044	0.152	0.379	0.889	0.853	0.915	0.915	1	1	0.814	0.618	0.451	0.17	0.0585	0.048
5	0.072	0.275	0.467	0.825	0.854	0.878	0.905	0.942	1	0.752	0.723	0.337	0.242	0.0517	0.052
6	0.078	0.141	0.368	0.87	0.86	0.919	0.939	1	1	0.79	0.687	0.315	0.183	0.0715	0.057
7	0.073	0.104	0.531	0.836	0.833	0.871	0.852	0.952	1	0.81	0.649	0.318	0.132	0.0769	0.078
8	0.067	0.134	0.547	0.853	0.832	0.863	0.866	0.927	1	0.805	0.661	0.492	0.113	0.0739	0.052
9	0.074	0.19	0.304	0.818	0.83	0.84	0.858	0.906	1	0.789	0.598	0.311	0.166	0.0768	0.089
10	0.083	0.195	0.552	0.799	0.874	0.844	0.883	0.971	1	0.8	0.746	0.466	0.245	0.084	0.066

## Sheet: WG and WL
Soil water potential	-Mpa	CK	D3	D8	D12L	E	mmol m-2 s-1	CK	D3	D8	D12L	LA	m2	CK	D3	D8	D12L	A	*10-5 m2	CK	D3	D8	D12L
	1	0	1.557	1.666	2.562		1	20.018	21.276	15.67	0		1	0.3592	0.3662	0.2579	0		1	12.793	13.403	9.608	8.204
	2	0.052	1.503	1.939	2.643		2	24.891	18.181	18.843	0		2	0.2837	0.3257	0.3092	0		2	11.993	11.879	14.289	12.11
	3	0.213	1.35	1.933	2.661		3	23.885	19.541	19.053	0		3	0.2632	0.3738	0.3455	0		3	8.02	11.681	10.242	8.21
	4	0	1.098	1.677	2.721		4	22.343	13.798	17.5	0		4	0.3492	0.3548	0.3547	0		4	12.03	11.111	14.951	14.228
	5	0.012	1.419	1.836	2.622		5	25.218	16.12	16.94	0		5	0.3235	0.3602	0.2998	0		5	14.52	8.922	8.388	12.564
	6	0.018	0.996	1.677	2.667		6	23.744	22.512	19.734	0		6	0.3019	0.2916	0.3146	0		6	14.933	13.32	10.564	12.383
	7	0.072	0.852	1.998	2.736		7	21.251	20.476	18.344	0		7	0.3412	0.2736	0.2705	0		7	13.984	12.962	9.829	13.013
	8	0.075	0.996	1.906	2.64		8	20.056	17.266	15.519	0		8	0.3112	0.3935	0.3818	0		8	10.588	12.87	13.879	13.78
	9	0.105	1.218	1.635	2.631		9	20.193	19.561	15.623	0		9	0.3726	0.3538	0.3512	0		9	13.528	10.102	14.864	12.821
	10	0.03	1.239	1.968	2.673		10	23.404	14.734	16.331	0		10	0.3222	0.2509	0.3718	0		10	13.643	12.754	14.562	9.084
